# Supplementary material for: Cryo-EM of human rhinovirus reveals capsid-RNA duplex interactions that provide insights into virus assembly and genome uncoating
Source: PubMed Central journal article supplement — Commun Biol. 2024 Nov 13;7:1501. doi: 10.1038/s42003-024-07213-2 (PMC11561273; doi:10.1038/s42003-024-07213-2), 2024-11-13
Supplement: 42003_2024_7213_MOESM3_ESM.pdf [file 42003_2024_7213_MOESM3_ESM.pdf]

## Description of Additional Supplementary Files

**File name:** Supplementary Movie 1

**Description:** Movie depicting the internal dodecahedral cage of dsRNA filaments in RV-B14. Each dsRNA duplex contains 14 bp (blue slabs for bases).

**File name:** Supplementary Movie 2

**Description:** Movie depicting the five classes obtained after a focused classification on the dsRNA region at the capsid interior at the two-fold axes. Class I (grey) accounted for 8% of the total two-fold regions analyzed; class II (yellow) for another 4%; class III (cyan) for 29%; class IV (magenta) for 24%; and class V (purple) for 35%.

**File name:** Supplementary Movie 3

**Description:** Movie depicting selected interactions between the dsRNA duplex and the capsid proteins VP1 and VP2.

**File name:** Supplementary Movie 4

**Description:** Movie depicting the transition between full and empty RV-B14 capsids, highlighting the conformational change of Trp38 (green) and Lys 52 (blue) of VP2.
